# Supplementary material for: The Missing Science: Epidemiological data gaps for COVID-19 policy in the United States
Source: bioRxiv or medRxiv preprint supplement (doi:10.1101/2021.02.11.21251602), 2021-02-12
Supplement: Supplementary file [file media-1.pdf]

**Table S1. Infection transmissibility and severity parameters for Influenza H1N1 (2009) within the Pandemic Severity Assessment Framework**

| Parameter                                        | Range of anticipated values | Value for Influenza H1N1 | Severity score (1 = Least severe to 7 = most severe) |
|--------------------------------------------------|-----------------------------|--------------------------|------------------------------------------------------|
| <b>Transmissibility</b>                          |                             |                          |                                                      |
| Symptomatic attack rate, community, %            | <10 % to >25%               | 20%                      | 3                                                    |
| Symptomatic attack rate, school or university, % | <20% to >36%                | NA                       | NA                                                   |
| Symptomatic attack rate, workplace, %            | <10 % to >25%               | NA                       | NA                                                   |
| Household secondary attack rate, symptomatic, %  | < 5% to > 21%               | 13%                      | 3                                                    |
| R0: reproductive number                          | <1.1 to >1.8                | 1.4                      | 3                                                    |
| Peak % outpatient illness visits                 | 1-3 % to >13%               | 7%                       | 3                                                    |
| <b>Clinical severity</b>                         |                             |                          |                                                      |
| Case-fatality ratio (Infection fatality ratio)   | < 0.02 to > 1%              | 0.02%                    | 2                                                    |
| Case-hospitalization ratio                       | < 0.5 to > 7%               | 0.05%                    | 2                                                    |
| Ratio, deaths: hospitalizations                  | <3 to > 18%                 | 4.7%                     | 2                                                    |

**Table S2. Accessed Centers for Disease Control Webpages**

| <b>Webpage</b>                                                                                                                  | <b>Version Date</b> | <b>Current Website URL</b>                                                                                                                                                                                                                                          |
|---------------------------------------------------------------------------------------------------------------------------------|---------------------|---------------------------------------------------------------------------------------------------------------------------------------------------------------------------------------------------------------------------------------------------------------------|
| COVID-19 Pandemic Planning Scenarios                                                                                            | 10 September 2020   | <a href="https://www.cdc.gov/coronavirus/2019-ncov/hcp/planning-scenarios.html">https://www.cdc.gov/coronavirus/2019-ncov/hcp/planning-scenarios.html</a>                                                                                                           |
| COVID-19 Hospitalization and Death by Age                                                                                       | 18 Aug 2020         | <a href="https://www.cdc.gov/coronavirus/2019-ncov/covid-data/investigations-discovery/hospitalization-death-by-age.html">https://www.cdc.gov/coronavirus/2019-ncov/covid-data/investigations-discovery/hospitalization-death-by-age.html</a>                       |
| COVID-19 Hospitalization and Death by Race/Ethnicity                                                                            | 30 Nov 2020         | <a href="https://www.cdc.gov/coronavirus/2019-ncov/covid-data/investigations-discovery/hospitalization-death-by-race-ethnicity.html">https://www.cdc.gov/coronavirus/2019-ncov/covid-data/investigations-discovery/hospitalization-death-by-race-ethnicity.html</a> |
| COVIDView: A weekly surveillance summary of COVID-19 activity in the U.S.                                                       | Updated Weekly      | <a href="https://www.cdc.gov/coronavirus/2019-ncov/covid-data/covidview/index.html">https://www.cdc.gov/coronavirus/2019-ncov/covid-data/covidview/index.html</a>                                                                                                   |
| Estimated Disease Burden of COVID-19                                                                                            | 3 Dec 2021          | <a href="https://www.cdc.gov/coronavirus/2019-ncov/cases-updates/burden.html">https://www.cdc.gov/coronavirus/2019-ncov/cases-updates/burden.html</a>                                                                                                               |
| Commercial Laboratory Seroprevalence Survey Data                                                                                | 21 July 2020        | <a href="https://covid.cdc.gov/covid-data-tracker/#serology-surveillance">https://covid.cdc.gov/covid-data-tracker/#serology-surveillance</a>                                                                                                                       |
| Nationwide Commercial Laboratory Seroprevalence Survey                                                                          | Updated bi-monthly  | <a href="https://covid.cdc.gov/covid-data-tracker/#national-lab">https://covid.cdc.gov/covid-data-tracker/#national-lab</a>                                                                                                                                         |
| Coronavirus Disease 2019 (COVID-19)-Associated Hospitalization Surveillance Network (COVID-NET)                                 | Updated Weekly      | <a href="https://www.cdc.gov/coronavirus/2019-ncov/covid-data/covid-net/purpose-methods.html">https://www.cdc.gov/coronavirus/2019-ncov/covid-data/covid-net/purpose-methods.html</a>                                                                               |
| United States COVID-19 Cases and Deaths by State                                                                                | Updated Daily       | <a href="https://covid.cdc.gov/covid-data-tracker/#cases_casesper100klast7days">https://covid.cdc.gov/covid-data-tracker/#cases_casesper100klast7days</a>                                                                                                           |
| Evidence used to update the list of underlying medical conditions that increase a person's risk of severe illness from COVID-19 | 2 Nov 2020          | <a href="https://www.cdc.gov/coronavirus/2019-ncov/need-extra-precautions/evidence-table.html">https://www.cdc.gov/coronavirus/2019-ncov/need-extra-precautions/evidence-table.html</a>                                                                             |

Table S3. List of reviewed CDC-affiliated studies.

| Month    | First author       | Title                                                                                                                                                                     | Publication | DOI                                                                                                                     | Category    | Study category         | Data source                   | Description of study outcomes                                                                                                        | Setting                    | Sub-population     | Secondary infection Risk | Effect measures of any risk factor for infection | Effect measures for any risk factors for hospitalization, ICU stay, or death | Symptom prevalence or symptomatic infection fraction | Infection hospitalization or fatality ratios | Measure of incidence or prevalence of infection, clinical illness, hospitalization, or death | Any epidemiologic measure of an indirect pandemic effect |
|----------|--------------------|---------------------------------------------------------------------------------------------------------------------------------------------------------------------------|-------------|-------------------------------------------------------------------------------------------------------------------------|-------------|------------------------|-------------------------------|--------------------------------------------------------------------------------------------------------------------------------------|----------------------------|--------------------|--------------------------|--------------------------------------------------|------------------------------------------------------------------------------|------------------------------------------------------|----------------------------------------------|----------------------------------------------------------------------------------------------|----------------------------------------------------------|
| February | Patel              | Initial Public Health Response and Interim Clinical Guidance for the 2019 Novel Coronavirus Outbreak — United States, December 31, 2019–February 4, 2020                  | MMWR        | <a href="http://dx.doi.org/10.15585/mmwr.mm6905a1externalicon">http://dx.doi.org/10.15585/mmwr.mm6905a1externalicon</a> | Descriptive | Case series or cluster | Passive surveillance program  | Frequency of exposure characteristics of initial 11 U.S. 2019 novel coronavirus cases                                                | General community          | General population |                          |                                                  |                                                                              |                                                      |                                              |                                                                                              |                                                          |
| February | Bajema             | Persons Evaluated for 2019 Novel Coronavirus — United States, January 2020                                                                                                | MMWR        | <a href="http://dx.doi.org/10.15585/mmwr.mm6906e1">http://dx.doi.org/10.15585/mmwr.mm6906e1</a>                         | Descriptive | Case series or cluster | Passive surveillance program  | Frequency of clinical characteristics and epidemiologic risk factors persons tested for 2019 novel coronavirus                       | General community          | General population |                          |                                                  |                                                                              |                                                      |                                              |                                                                                              |                                                          |
| February | Jemigan            | Update: Public Health Response to the Coronavirus Disease 2019 Outbreak — United States, February 24, 2020                                                                | MMWR        | <a href="http://dx.doi.org/10.15585/mmwr.mm6908e1">http://dx.doi.org/10.15585/mmwr.mm6908e1</a>                         | Descriptive | Case series or cluster | Passive surveillance program  | Frequency of exposure characteristics of initial 14 U.S. 2019 novel coronavirus cases diagnosed with the U.S.                        | General community          | General population |                          |                                                  |                                                                              |                                                      |                                              |                                                                                              |                                                          |
| March    | Burke              | Active Monitoring of Persons Exposed to Patients with Confirmed COVID-19 — United States, January–February 2020                                                           | MMWR        | <a href="http://dx.doi.org/10.15585/mmwr.mm6909e1">http://dx.doi.org/10.15585/mmwr.mm6909e1</a>                         | Analytic    | Prospective cohort     | Field data collection         | Secondary infection risks for household and non-household contacts                                                                   | General community          | General population | ×                        |                                                  |                                                                              |                                                      |                                              |                                                                                              |                                                          |
| March    | McMichael          | COVID-19 in a Long-Term Care Facility — King County, Washington, February 27–March 9, 2020                                                                                | MMWR        | <a href="http://dx.doi.org/10.15585/mmwr.mm6912e1externalicon">http://dx.doi.org/10.15585/mmwr.mm6912e1externalicon</a> | Descriptive | Case series or cluster | Field data collection         | Frequency of characteristics of patients with COVID-19 epidemiologically linked to skilled nursing facility outbreak                 | Skilled nursing facilities | LCTF residents     |                          |                                                  |                                                                              |                                                      |                                              |                                                                                              |                                                          |
| March    | COVID-19 Responses | Severe Outcomes Among Patients with Coronavirus Disease 2019 (COVID-19) — United States, February 12–March 16, 2020                                                       | MMWR        | <a href="http://dx.doi.org/10.15585/mmwr.mm6912e2externalicon">http://dx.doi.org/10.15585/mmwr.mm6912e2externalicon</a> | Descriptive | Cross-sectional        | Passive surveillance program  | Frequency of clinical outcomes among initial 4226 confirmed U.S. novel coronavirus cases                                             | General community          | General population |                          |                                                  | ×                                                                            |                                                      |                                              |                                                                                              |                                                          |
| March    | Moriarty           | Public Health Responses to COVID-19 Outbreaks on Cruise Ships — Worldwide, February–March 2020                                                                            | MMWR        | <a href="http://dx.doi.org/10.15585/mmwr.mm6912e3">http://dx.doi.org/10.15585/mmwr.mm6912e3</a>                         | Descriptive | Ecologic               | Field data collection         | Frequency of demographic characteristics of passengers and crew members on board two cruise ships with COVID-19 outbreaks            | Cruise ship                | Travelers          |                          |                                                  |                                                                              |                                                      |                                              |                                                                                              |                                                          |
| March    | McMichael          | Epidemiology of Covid-19 in a Long-Term Care Facility in King County, Washington                                                                                          | NEJM        | <a href="https://www.nejm.org/doi/full/10.1056/NEJMoa2005412">https://www.nejm.org/doi/full/10.1056/NEJMoa2005412</a>   | Descriptive | Case series or cluster | Field data collection         | Frequency of demographic and Clinical Characteristics of Persons with Confirmed Covid-19 Linked to skilled nursing facility exposure | Skilled nursing facilities | Elderly            |                          |                                                  |                                                                              |                                                      |                                              |                                                                                              |                                                          |
| April    | COVID-19 Responses | Preliminary Estimates of the Prevalence of Selected Underlying Health Conditions Among Patients with Coronavirus Disease 2019 — United States, February 12–March 28, 2020 | MMWR        | <a href="http://dx.doi.org/10.15585/mmwr.mm6913e2externalicon">http://dx.doi.org/10.15585/mmwr.mm6913e2externalicon</a> | Analytic    | Cross-sectional        | Passive surveillance program  | Frequency of clinical outcomes and hospitalization status among COVID-19 patients by demographic and clinical characteristics        | General community          | General population |                          |                                                  | ×                                                                            |                                                      |                                              |                                                                                              |                                                          |
| April    | Kimball            | Asymptomatic and Presymptomatic SARS-CoV-2 Infections in Residents of a Long-Term Care Skilled Nursing Facility — King County, Washington, March 2020                     | MMWR        | <a href="http://dx.doi.org/10.15585/mmwr.mm6913e1">http://dx.doi.org/10.15585/mmwr.mm6913e1</a>                         | Descriptive | Case series or cluster | Field data collection         | Frequency of demographic characteristics and reported symptoms among skilled nursing facility residents by SARS-CoV-2 test status    | Skilled nursing facilities | LCTF residents     |                          |                                                  |                                                                              |                                                      |                                              |                                                                                              |                                                          |
| April    | Roxby              | Detection of SARS-CoV-2 Among Residents and Staff Members of an Independent and Assisted Living Community for Older Adults — Seattle, Washington, 2020                    | MMWR        | <a href="http://dx.doi.org/10.15585/mmwr.mm6914e2externalicon">http://dx.doi.org/10.15585/mmwr.mm6914e2externalicon</a> | Descriptive | Case series or cluster | Field data collection         | Frequency of characteristics of skilled nursing facility residents and staff members with positive SARS-CoV-2 test results           | Skilled nursing facilities | LCTF residents     |                          |                                                  |                                                                              |                                                      |                                              |                                                                                              |                                                          |
| April    | Zwald              | Rapid Sentinel Surveillance for COVID-19 — Santa Clara County, California, March 2020                                                                                     | MMWR        | <a href="http://dx.doi.org/10.15585/mmwr.mm6914e3externalicon">http://dx.doi.org/10.15585/mmwr.mm6914e3externalicon</a> | Descriptive | Cross-sectional        | Sentinel surveillance program | Number of positive test results for SARS-CoV-2 among respiratory specimens submitted for influenza                                   | General community          | General population |                          |                                                  |                                                                              |                                                      |                                              |                                                                                              |                                                          |
| April    | COVID-19 Responses | Coronavirus Disease 2019 in Children — United States, February 12–April 2, 2020                                                                                           | MMWR        | <a href="http://dx.doi.org/10.15585/mmwr.mm6914e4">http://dx.doi.org/10.15585/mmwr.mm6914e4</a>                         | Descriptive | Cross-sectional        | Passive surveillance program  | Frequency of signs and symptoms among pediatric and adult patients with laboratory-confirmed COVID-19                                | General community          | Children           |                          |                                                  |                                                                              |                                                      |                                              |                                                                                              |                                                          |
| April    | COVID-19 Responses | Geographic Differences in COVID-19 Cases, Deaths, and Incidence — United States, February 12–April 7, 2020                                                                | MMWR        | <a href="http://dx.doi.org/10.15585/mmwr.mm6915e4">http://dx.doi.org/10.15585/mmwr.mm6915e4</a>                         | Descriptive | Ecologic               | Passive surveillance program  | Cumulative number of reported COVID-19 cases, by jurisdiction                                                                        | General community          | General population |                          |                                                  |                                                                              |                                                      |                                              |                                                                                              |                                                          |

Table S3. List of reviewed CDC-affiliated studies.

|       |                   |                                                                                                                                                                   |      |                                                                                                                         |             |                        |                              |                                                                                                                                                                    |                                      |                          |   |
|-------|-------------------|-------------------------------------------------------------------------------------------------------------------------------------------------------------------|------|-------------------------------------------------------------------------------------------------------------------------|-------------|------------------------|------------------------------|--------------------------------------------------------------------------------------------------------------------------------------------------------------------|--------------------------------------|--------------------------|---|
| April | Ghinal            | Community Transmission of SARS-CoV-2 at Two Family Gatherings — Chicago, Illinois, February–March 2020                                                            | MMWR | <a href="http://dx.doi.org/10.15585/mmwr.mm6915e1">http://dx.doi.org/10.15585/mmwr.mm6915e1</a>                         | Descriptive | Case series or cluster | Field data collection        | Incubation periods                                                                                                                                                 | Private social gathering             | General population       |   |
| April | Heinzerling       | Transmission of COVID-19 to Health Care Personnel During Exposures to a Hospitalized Patient — Solano County, California, February 2020                           | MMWR | <a href="http://dx.doi.org/10.15585/mmwr.mm6915e5externalicon">http://dx.doi.org/10.15585/mmwr.mm6915e5externalicon</a> | Descriptive | Case series or cluster | Field data collection        | Frequency of demographic and exposure risk characteristics health care workers exposed to an index case                                                            | Healthcare facility                  | Healthcare workers       |   |
| April | COVID-19 Response | Characteristics of Health Care Personnel with COVID-19 — United States, February 12–April 9, 2020                                                                 | MMWR | <a href="http://dx.doi.org/10.15585/mmwr.mm6915e6">http://dx.doi.org/10.15585/mmwr.mm6915e6</a>                         | Descriptive | Cross-sectional        | Passive surveillance program | Frequency of demographic characteristics, exposures, symptoms, and underlying health conditions among health care personnel with COVID-19                          | General community                    | Healthcare workers       |   |
| April | Lasry             | Timing of Community Mitigation and Changes in Reported COVID-19 and Community Mobility — Four U.S. Metropolitan Areas, February 26–April 1, 2020                  | MMWR | <a href="http://dx.doi.org/10.15585/mmwr.mm6915e2">http://dx.doi.org/10.15585/mmwr.mm6915e2</a>                         | Descriptive | Ecologic               | Passive surveillance program | Timing of community mitigation measures relative to COVID-19 confirmed case counts                                                                                 | General community                    | General population       |   |
| April | Garg              | Hospitalization Rates and Characteristics of Patients Hospitalized with Laboratory-Confirmed Coronavirus Disease 2019 — COVID-NET, 14 States, March 1–30, 2020    | MMWR | <a href="http://dx.doi.org/10.15585/mmwr.mm6915e3externalicon">http://dx.doi.org/10.15585/mmwr.mm6915e3externalicon</a> | Descriptive | Cross-sectional        | Active surveillance program  | Laboratory-confirmed coronavirus disease 2019 (COVID-19)-associated hospitalization incidence rates by age group and surveillance site                             | General community                    | General population       | × |
| April | Chang             | Cleaning and Disinfectant Chemical Exposures and Temporal Associations with COVID-19 — National Poison Data System, United States, January 1, 2020–March 31, 2020 | MMWR | <a href="http://dx.doi.org/10.15585/mmwr.mm6916e1externalicon">http://dx.doi.org/10.15585/mmwr.mm6916e1externalicon</a> | Descriptive | Cross-sectional        | Passive surveillance program | Trends in poison control reports for exposures to cleaners and disinfectants                                                                                       | General community                    | General population       |   |
| April | Arons             | Presymptomatic SARS-CoV-2 Infections and Transmission in a Skilled Nursing Facility                                                                               | NEJM | <a href="https://www.nejm.org/doi/full/10.1056/NEJMa2008457">https://www.nejm.org/doi/full/10.1056/NEJMa2008457</a>     | Descriptive | Case series or cluster | Field data collection        | Frequency of demographic Characteristics and reported Symptoms among skilled nursing facility residents by SARS-Cov-2 test status                                  | Skilled nursing facilities           | LCTF residents           |   |
| May   | Tobolowsky        | COVID-19 Outbreak Among Three Affiliated Homeless Service Sites — King County, Washington, 2020                                                                   | MMWR | <a href="http://dx.doi.org/10.15585/mmwr.mm6917e2externalicon">http://dx.doi.org/10.15585/mmwr.mm6917e2externalicon</a> | Descriptive | Case series or cluster | Field data collection        | Prevalence of positive SARS-CoV-2 tests                                                                                                                            | Homeless shelter                     | Homeless individuals     |   |
| May   | Mosites           | Assessment of SARS-CoV-2 Infection Prevalence in Homeless Shelters — Four U.S. Cities, March 27–April 15, 2020                                                    | MMWR | <a href="http://dx.doi.org/10.15585/mmwr.mm6917e1">http://dx.doi.org/10.15585/mmwr.mm6917e1</a>                         | Descriptive | Ecologic               | Field data collection        | Prevalence of positive SARS-CoV-2 tests                                                                                                                            | Homeless shelter                     | Homeless individuals     | × |
| May   | Gold              | Characteristics and Clinical Outcomes of Adult Patients Hospitalized with COVID-19 — Georgia, March 2020                                                          | MMWR | <a href="http://dx.doi.org/10.15585/mmwr.mm6918e1">http://dx.doi.org/10.15585/mmwr.mm6918e1</a>                         | Descriptive | Cross-sectional        | Medical records              | Frequency of medical conditions among adults hospitalized with COVID-19 by age group and race/ethnicity                                                            | General community                    | General population       |   |
| May   | Rosenberg         | New York State Coronavirus 2019 Response Team. COVID-19 Testing, Epidemic Features, Hospital Outcomes, and Household Prevalence, New York State-March 2020        | CID  | <a href="https://doi.org/10.1093/cid/ciaa549">10.1093/cid/ciaa549</a>                                                   | Analytic    | Cross-sectional        | Passive surveillance program | Frequency of demographics, Risk Factors, Comorbidities, Symptoms, and Hospital Outcomes for Persons Diagnosed With Coronavirus Disease 2019; household attack rate | General community                    | General population       | × |
| May   | Wallace           | COVID-19 in Correctional and Detention Facilities — United States, February–April 2020                                                                            | MMWR | <a href="http://dx.doi.org/10.15585/mmwr.mm6919e1externalicon">http://dx.doi.org/10.15585/mmwr.mm6919e1externalicon</a> | Descriptive | Cross-sectional        | Passive surveillance program | Frequency of COVID-19 infections, hospitalizations, and deaths among correctional and detention facility residents and staff                                       | Correctional or detention facilities | Incarcerated individuals |   |
| May   | Wallace           | Public Health Response to COVID-19 Cases in Correctional and Detention Facilities — Louisiana, March–April 2020                                                   | MMWR | <a href="http://dx.doi.org/10.15585/mmwr.mm6919e3externalicon">http://dx.doi.org/10.15585/mmwr.mm6919e3externalicon</a> | Descriptive | Ecologic               | Passive surveillance program | Frequency of characteristics of correctional facilities by presence of COVID-19 cases among incarcerated                                                           | Correctional or detention facilities | Incarcerated individuals |   |
| May   | Hammer            | High SARS-CoV-2 Attack Rate Following Exposure at a Choir Practice — Skagit County, Washington, March 2020                                                        | MMWR | <a href="http://dx.doi.org/10.15585/mmwr.mm6919e6externalicon">http://dx.doi.org/10.15585/mmwr.mm6919e6externalicon</a> | Descriptive | Case series or cluster | Field data collection        | Number of event participants with and without COVID-19-compatible symptoms                                                                                         | Private social gathering             | General population       |   |
| May   | Santoli           | Effects of the COVID-19 Pandemic on Routine Pediatric Vaccine Ordering and Administration — United States, 2020                                                   | MMWR | <a href="http://dx.doi.org/10.15585/mmwr.mm6919e2">http://dx.doi.org/10.15585/mmwr.mm6919e2</a>                         | Descriptive | Ecologic               | Other                        | Weekly trends in vaccine orders                                                                                                                                    | General community                    | Children                 | × |
| May   | COVID-19 Response | Preliminary Estimate of Excess Mortality During the COVID-19 Outbreak — New York City, March 11–May 2, 2020                                                       | MMWR | <a href="http://dx.doi.org/10.15585/mmwr.mm6919e5externalicon">http://dx.doi.org/10.15585/mmwr.mm6919e5externalicon</a> | Descriptive | Ecologic               | Passive surveillance program | Number of laboratory-confirmed and probable COVID-19-associated deaths and total estimated excess deaths                                                           | General community                    | General population       | × |
| May   | Hammer            | High COVID-19 Attack Rate Among Attendees at Events at a Church — Arkansas, March 2020                                                                            | MMWR | <a href="http://dx.doi.org/10.15585/mmwr.mm6919e6externalicon">http://dx.doi.org/10.15585/mmwr.mm6919e6externalicon</a> | Descriptive | Case series or cluster | Field data collection        | Frequency of demographic characteristics by church attendance and and SARS-CoV-2 testing status; attack rate by demographic characteristic and church activity     | Public social gathering              | General population       |   |
| May   | Bramer            | Decline in Child Vaccination Coverage During the COVID-19 Pandemic — Michigan Care Improvement Registry, May 2016–May 2020                                        | MMWR | <a href="http://dx.doi.org/10.15585/mmwr.mm6920e1">http://dx.doi.org/10.15585/mmwr.mm6920e1</a>                         | Descriptive | Ecologic               | Passive surveillance program | Trends in the proportion of Michigan infants and children with timely vaccination                                                                                  | General community                    | Children                 | × |

Table S3. List of reviewed CDC-affiliated studies.

|      |           |                                                                                                                                                                                                               |      |                                                                                                                         |             |                        |                                |                                                                                                                                                                                                                                                                                                               |                                      |                          |   |  |   |
|------|-----------|---------------------------------------------------------------------------------------------------------------------------------------------------------------------------------------------------------------|------|-------------------------------------------------------------------------------------------------------------------------|-------------|------------------------|--------------------------------|---------------------------------------------------------------------------------------------------------------------------------------------------------------------------------------------------------------------------------------------------------------------------------------------------------------|--------------------------------------|--------------------------|---|--|---|
| May  | Dora      | Universal and Serial Laboratory Testing for SARS-CoV-2 at a Long-Term Care Skilled Nursing Facility for Veterans — Los Angeles, California, 2020                                                              | MMWR | <a href="http://dx.doi.org/10.15585/mmwr.mm6921e1externalicon">http://dx.doi.org/10.15585/mmwr.mm6921e1externalicon</a> | Descriptive | Case series or cluster | Field data collection          | Frequency of characteristics of long-term care skilled nursing facility residents with positive test results for SARS-CoV-2                                                                                                                                                                                   | Skilled nursing facilities           | LCTF residents           |   |  |   |
| May  | Chu       | Investigation and Serologic Follow-Up of Contacts of an Early Confirmed Case-Patient with COVID-19, Washington, USA                                                                                           | EID  | <a href="https://dx.doi.org/10.3201/eid2608.201423">https://dx.doi.org/10.3201/eid2608.201423</a>                       | Descriptive | Case series or cluster | Field data collection          | Prevalence of positive SARS-CoV-2 tests among contacts                                                                                                                                                                                                                                                        | General community                    | General population       |   |  |   |
| June | Marcus    | COVID-19 Monitoring and Response Among U.S. Air Force Basic Military Trainees — Texas, March–April 2020                                                                                                       | MMWR | <a href="http://dx.doi.org/10.15585/mmwr.mm6922e2">http://dx.doi.org/10.15585/mmwr.mm6922e2</a>                         | Descriptive | Cross-sectional        | Passive surveillance program   | Cumulative number of tested trainees with respiratory symptoms and positive test results for SARS-CoV-2                                                                                                                                                                                                       | Military setting                     | Military personnel       |   |  |   |
| June | Jorden    | Evidence for Limited Early Spread of COVID-19 Within the United States, January–February 2020                                                                                                                 | MMWR | <a href="http://dx.doi.org/10.15585/mmwr.mm6922e1">http://dx.doi.org/10.15585/mmwr.mm6922e1</a>                         | Descriptive | Cross-sectional        | Syndromic surveillance program | Proportion of emergency department (ED) visits for COVID-19–like illness                                                                                                                                                                                                                                      | General community                    | General population       |   |  | × |
| June | Payne     | SARS-CoV-2 Infections and Serologic Responses from a Sample of U.S. Navy Service Members — USS Theodore Roosevelt, April 2020                                                                                 | MMWR | <a href="http://dx.doi.org/10.15585/mmwr.mm6923e4externalicon">http://dx.doi.org/10.15585/mmwr.mm6923e4externalicon</a> | Analytic    | Cross-sectional        | Field data collection          | Frequency / odds of SARS-CoV-2 infection by demographic and clinical characteristics and prevention behaviors; clinical fraction                                                                                                                                                                              | Military setting                     | Military personnel       | × |  | × |
| June | Hartnett  | Impact of the COVID-19 Pandemic on Emergency Department Visits — United States, January 1, 2019–May 30, 2020                                                                                                  | MMWR | <a href="http://dx.doi.org/10.15585/mmwr.mm6923e1">http://dx.doi.org/10.15585/mmwr.mm6923e1</a>                         | Analytic    | Ecologic               | Syndromic surveillance program | Differences in mean weekly numbers of emergency department (ED) visits by diagnostic categories                                                                                                                                                                                                               | General community                    | General population       |   |  | × |
| June | Gharpure  | Knowledge and Practices Regarding Safe Household Cleaning and Disinfection for COVID-19 Prevention — United States, May 2020                                                                                  | MMWR | <a href="http://dx.doi.org/10.15585/mmwr.mm6923e2externalicon">http://dx.doi.org/10.15585/mmwr.mm6923e2externalicon</a> | Descriptive | Cross-sectional        | Survey                         | Prevalence of cleaning and disinfection practices to prevent SARS-CoV-2 infection                                                                                                                                                                                                                             | General community                    | General population       |   |  |   |
| June | Stokes    | Coronavirus Disease 2019 Case Surveillance — United States, January 22–May 30, 2020                                                                                                                           | MMWR | <a href="http://dx.doi.org/10.15585/mmwr.mm6924e2externalicon">http://dx.doi.org/10.15585/mmwr.mm6924e2externalicon</a> | Descriptive | Cross-sectional        | Passive surveillance program   | Cumulative incidence of reported laboratory-confirmed COVID-19 cases by age; frequency of clinical characteristics of confirmed cases by age                                                                                                                                                                  | General community                    | General population       |   |  |   |
| June | Czeisler  | Public Attitudes, Behaviors, and Beliefs Related to COVID-19, Stay-at-Home Orders, Nonessential Business Closures, and Public Health Guidance — United States, New York City, and Los Angeles, May 5–12, 2020 | MMWR | <a href="http://dx.doi.org/10.15585/mmwr.mm6924e1">http://dx.doi.org/10.15585/mmwr.mm6924e1</a>                         | Analytic    | Cross-sectional        | Survey                         | Prevalence of attitudes, behaviors, and beliefs related to COVID-19, stay-at-home orders, nonessential business closures, and public health guidance, by respondent characteristics                                                                                                                           | General community                    | General population       |   |  |   |
| June | Dawson    | Loss of Taste and Smell as Distinguishing Symptoms of COVID-19                                                                                                                                                | CID  | <a href="https://doi.org/10.1093/cid/ciaa799">https://doi.org/10.1093/cid/ciaa799</a>                                   | Analytic    | Cross-sectional        | Field data collection          | Prevalence of self reported symptoms                                                                                                                                                                                                                                                                          | General community                    | General population       |   |  | × |
| June | Ellington | Characteristics of Women of Reproductive Age with Laboratory-Confirmed SARS-CoV-2 Infection by Pregnancy Status — United States, January 20–June 7, 2020                                                      | MMWR | <a href="http://dx.doi.org/10.15585/mmwr.mm6925a1">http://dx.doi.org/10.15585/mmwr.mm6925a1</a>                         | Analytic    | Cross-sectional        | Passive surveillance program   | Frequency of clinical characteristics; relative risk of hospitalizations, intensive care unit (ICU) admissions, receipt of mechanical ventilation, and deaths among women with laboratory-confirmed SARS-CoV-2 infection by pregnancy status, age group, and race/ethnicity; risk ratios for selected factors | General community                    | Pregnant women           |   |  | × |
| June | Killerby  | Characteristics Associated with Hospitalization Among Patients with COVID-19 — Metropolitan Atlanta, Georgia, March – April 2020                                                                              | MMWR | <a href="http://dx.doi.org/10.15585/mmwr.mm6925e1externalicon">http://dx.doi.org/10.15585/mmwr.mm6925e1externalicon</a> | Analytic    | Cross-sectional        | Medical records                | Odds ratios for risk factors for COVID-19 hospitalization                                                                                                                                                                                                                                                     | General community                    | General population       |   |  | × |
| June | Lange     | Potential Indirect Effects of the COVID-19 Pandemic on Use of Emergency Departments for Acute Life-Threatening Conditions — United States, January–May 2020                                                   | MMWR | <a href="http://dx.doi.org/10.15585/mmwr.mm6925e2externalicon">http://dx.doi.org/10.15585/mmwr.mm6925e2externalicon</a> | Descriptive | Cross-sectional        | Syndromic surveillance program | Percent change in the number of emergency department visits for myocardial infarction, stroke, and hyperglycemic crisis                                                                                                                                                                                       | General community                    | General population       |   |  | × |
| June | Dufort    | Multisystem Inflammatory Syndrome in Children in New York State                                                                                                                                               | NEJM | <a href="https://www.nejm.org/doi/full/10.1056/NEJMoa2021756">https://www.nejm.org/doi/full/10.1056/NEJMoa2021756</a>   | Descriptive | Cross-sectional        | Active surveillance program    | Frequency of demographic and clinical characteristics of children meeting surveillance criteria or MIS-C                                                                                                                                                                                                      | General community                    | Children                 |   |  |   |
| June | Feldstein | Multisystem Inflammatory Syndrome in U.S. Children and Adolescents                                                                                                                                            | NEJM | <a href="https://www.nejm.org/doi/full/10.1056/NEJMoa2021680">https://www.nejm.org/doi/full/10.1056/NEJMoa2021680</a>   | Descriptive | Cross-sectional        | Sentinel surveillance program  | Frequency of demographic and clinical characteristics of children meeting surveillance criteria or MIS-C                                                                                                                                                                                                      | General community                    | Children                 |   |  |   |
| July | Lewis     | COVID-19 Outbreak Among College Students After a Spring Break Trip to Mexico — Austin, Texas, March 26–April 5, 2020                                                                                          | MMWR | <a href="http://dx.doi.org/10.15585/mmwr.mm6926e1externalicon">http://dx.doi.org/10.15585/mmwr.mm6926e1externalicon</a> | Descriptive | Case series or cluster | Field data collection          | Frequency of symptoms among contacts by RT-PCR test status; calculated odds ratios                                                                                                                                                                                                                            | General community                    | College students         |   |  |   |
| July | Njunga    | Serial Laboratory Testing for SARS-CoV-2 Infection Among Incarcerated and Detained Persons in a Correctional and Detention Facility — Louisiana, April–May 2020                                               | MMWR | <a href="http://dx.doi.org/10.15585/mmwr.mm6926e2externalicon">http://dx.doi.org/10.15585/mmwr.mm6926e2externalicon</a> | Descriptive | Ecologic               | Field data collection          | Frequency of reported symptoms among incarcerated persons by SARS-CoV-2 test results                                                                                                                                                                                                                          | Correctional or detention facilities | Incarcerated individuals |   |  |   |

Table S3. List of reviewed CDC-affiliated studies.

|      |            |                                                                                                                                                                                                                              |      |                                                                                                                         |             |                        |                                |                                                                                                                                                                                                                  |                                      |                      |   |
|------|------------|------------------------------------------------------------------------------------------------------------------------------------------------------------------------------------------------------------------------------|------|-------------------------------------------------------------------------------------------------------------------------|-------------|------------------------|--------------------------------|------------------------------------------------------------------------------------------------------------------------------------------------------------------------------------------------------------------|--------------------------------------|----------------------|---|
| July | Tenforde   | Characteristics of Adult Outpatients and Inpatients with COVID-19 — 11 Academic Medical Centers, United States, March–May 2020                                                                                               | MMWR | <a href="http://dx.doi.org/10.15585/mmwr.mm6926e3externalicon">http://dx.doi.org/10.15585/mmwr.mm6926e3externalicon</a> | Descriptive | Cross-sectional        | Survey                         | Frequency of demographic, clinical, symptoms, and exposure characteristics of SARS-CoV-2 RT-PCR test positive individuals by inpatient status                                                                    | General community                    | General population   |   |
| July | Marshall   | Exposures Before Issuance of Stay-at-Home Orders Among Persons with Laboratory-Confirmed COVID-19 — Colorado, March 2020                                                                                                     | MMWR | <a href="http://dx.doi.org/10.15585/mmwr.mm6926e4">http://dx.doi.org/10.15585/mmwr.mm6926e4</a>                         | Descriptive | Cross-sectional        | Passive surveillance program   | Frequency of contact relationships and settings among SARS-CoV-2 RT-PCR test positive individuals before stay at home orders                                                                                     | General community                    | General population   |   |
| July | Callaghan  | Screening for SARS-CoV-2 Infection Within a Psychiatric Hospital and Considerations for Limiting Transmission Within Residential Psychiatric Facilities — Wyoming, 2020                                                      | MMWR | <a href="http://dx.doi.org/10.15585/mmwr.mm6926a4">http://dx.doi.org/10.15585/mmwr.mm6926a4</a>                         | Descriptive | Case series or cluster | Field data collection          | Frequency of characteristics of patients and health care personnel                                                                                                                                               | Correctional or detention facilities | LCTF residents       |   |
| July | Groenewald | Increases in Health-Related Workplace Absenteeism Among Workers in Essential Critical Infrastructure Occupations During the COVID-19 Pandemic — United States, March–April 2020                                              | MMWR | <a href="http://dx.doi.org/10.15585/mmwr.mm6927a1">http://dx.doi.org/10.15585/mmwr.mm6927a1</a>                         | Analytic    | Cross-sectional        | Survey                         | Prevalence of health-related workplace absenteeism                                                                                                                                                               | General community                    | General population   | × |
| July | Waltenberg | Update: COVID-19 Among Workers in Meat and Poultry Processing Facilities — United States, April–May 2020                                                                                                                     | MMWR | <a href="http://dx.doi.org/10.15585/mmwr.mm6927e2">http://dx.doi.org/10.15585/mmwr.mm6927e2</a>                         | Descriptive | Cross-sectional        | Passive surveillance program   | Number of laboratory-confirmed COVID-19 cases among workers in meat and poultry facilities                                                                                                                       | General community                    | Industrial workers   |   |
| July | Sanchez    | Initial and Repeated Point Prevalence Surveys to Inform SARS-CoV-2 Infection Prevention in 26 Skilled Nursing Facilities — Detroit, Michigan, March–May 2020                                                                 | MMWR | <a href="http://dx.doi.org/10.15585/mmwr.mm6927e1externalicon">http://dx.doi.org/10.15585/mmwr.mm6927e1externalicon</a> | Descriptive | Ecologic               | Field data collection          | Serial point prevalence of infection                                                                                                                                                                             | Skilled nursing facilities           | LCTF residents       |   |
| July | Hsu        | Race/Ethnicity, Underlying Medical Conditions, Homelessness, and Hospitalization Status of Adult Patients with COVID-19 at an Urban Safety-Net Medical Center — Boston, Massachusetts, 2020                                  | MMWR | <a href="http://dx.doi.org/10.15585/mmwr.mm6927a3externalicon">http://dx.doi.org/10.15585/mmwr.mm6927a3externalicon</a> | Descriptive | Cross-sectional        | Medical records                | Frequency of demographic and clinical characteristics of inpatients with COVID-19                                                                                                                                | General community                    | Homeless individuals |   |
| July | Kim        | Risk Factors for Intensive Care Unit Admission and In-hospital Mortality Among Hospitalized Adults Identified through the US Coronavirus Disease 2019 (COVID-19)-Associated Hospitalization Surveillance Network (COVID-NET) | CID  | <a href="https://doi.org/10.1093/cid/ciaa1012">https://doi.org/10.1093/cid/ciaa1012</a>                                 | Analytic    | Retrospective cohort   | Active surveillance program    | Odds of ICU admission for age and selected medical co-morbidities                                                                                                                                                | General community                    | General population   | × |
| July | Hendrix    | Absence of Apparent Transmission of SARS-CoV-2 from Two Stylists After Exposure at a Hair Salon with a Universal Face Covering Policy — Springfield, Missouri, May 2020                                                      | MMWR | <a href="http://dx.doi.org/10.15585/mmwr.mm6928e2">http://dx.doi.org/10.15585/mmwr.mm6928e2</a>                         | Descriptive | Case series or cluster | Field data collection          | Frequency of symptoms and positive SARS-CoV-2 tests among a convenience sample                                                                                                                                   | General community                    | General population   |   |
| July | Wortham    | Characteristics of Persons Who Died with COVID-19 — United States, February 12–May 18, 2020                                                                                                                                  | MMWR | <a href="http://dx.doi.org/10.15585/mmwr.mm6928e1">http://dx.doi.org/10.15585/mmwr.mm6928e1</a>                         | Descriptive | Cross-sectional        | Passive surveillance program   | Frequency of co-morbid conditions among COVID-19 associated deaths by age group                                                                                                                                  | General community                    | General population   |   |
| July | Burke      | Symptom Profiles of a Convenience Sample of Patients with COVID-19 — United States, January–April 2020                                                                                                                       | MMWR | <a href="http://dx.doi.org/10.15585/mmwr.mm6928a2externalicon">http://dx.doi.org/10.15585/mmwr.mm6928a2externalicon</a> | Descriptive | Cross-sectional        | Field data collection          | Frequency of reported symptoms among patients with laboratory-confirmed COVID-19, by age and hospitalization status                                                                                              | General community                    | General population   |   |
| July | Bushman    | Detection and Genetic Characterization of Community-Based SARS-CoV-2 Infections — New York City, March 2020                                                                                                                  | MMWR | <a href="http://dx.doi.org/10.15585/mmwr.mm6928a5externalicon">http://dx.doi.org/10.15585/mmwr.mm6928a5externalicon</a> | Descriptive | Ecologic               | Syndromic surveillance program | Trends in the daily percentage of emergency department (ED) visits for influenza-like illness (ILI), number of confirmed COVID-19 cases, and number and percentage of sentinel specimens positive for SARS-CoV-2 | General community                    | General population   | × |
| July | Fisher     | Factors Associated with Cloth Face Covering Use Among Adults During the COVID-19 Pandemic — United States, April and May 2020                                                                                                | MMWR | <a href="http://dx.doi.org/10.15585/mmwr.mm6928e3externalicon">http://dx.doi.org/10.15585/mmwr.mm6928e3externalicon</a> | Descriptive | Cross-sectional        | Survey                         | Period prevalence of cloth face covering use                                                                                                                                                                     | General community                    | General population   |   |
| July | Havers     | Seroprevalence of Antibodies to SARS-CoV-2 in 10 Sites in the United States, March 23–May 12, 2020                                                                                                                           | JAMA | <a href="http://10.1001/amainternmed.2020.4130">http://10.1001/amainternmed.2020.4130</a>                               | Descriptive | Ecologic               | Field data collection          | Seroprevalence of SARS-CoV-2 antibodies by time and region                                                                                                                                                       | General community                    | General population   | × |
| July | Razzaghi   | Estimated County-Level Prevalence of Selected Underlying Medical Conditions Associated with Increased Risk for Severe COVID-19 Illness — United States, 2018                                                                 | MMWR | <a href="http://dx.doi.org/10.15585/mmwr.mm6929a1">http://dx.doi.org/10.15585/mmwr.mm6929a1</a>                         | Analytic    | Ecologic               | Survey                         | Estimates of prevalence of selected underlying medical conditions                                                                                                                                                | General community                    | General population   |   |
| July | Biggs      | Estimated Community Seroprevalence of SARS-CoV-2 Antibodies — Two Georgia Counties, April 28–May 3, 2020                                                                                                                     | MMWR | <a href="http://dx.doi.org/10.15585/mmwr.mm6929e2externalicon">http://dx.doi.org/10.15585/mmwr.mm6929e2externalicon</a> | Descriptive | Ecologic               | Active surveillance program    | Prevalence of antibody positivity by demographic characteristic                                                                                                                                                  | General community                    | General population   | × |
| July | Menachemi  | Population Point Prevalence of SARS-CoV-2 Infection Based on a Statewide Random Sample — Indiana, April 25–29, 2020                                                                                                          | MMWR | <a href="http://dx.doi.org/10.15585/mmwr.mm6929e1">http://dx.doi.org/10.15585/mmwr.mm6929e1</a>                         | Descriptive | Cross-sectional        | Active surveillance program    | Prevalence of antibody positivity by current infection status                                                                                                                                                    | General community                    | General population   | × |

Table S3. List of reviewed CDC-affiliated studies.

|        |               |                                                                                                                                                                                   |      |                                                                                                                         |             |                        |                              |                                                                                                                                                                         |                                      |                          |   |
|--------|---------------|-----------------------------------------------------------------------------------------------------------------------------------------------------------------------------------|------|-------------------------------------------------------------------------------------------------------------------------|-------------|------------------------|------------------------------|-------------------------------------------------------------------------------------------------------------------------------------------------------------------------|--------------------------------------|--------------------------|---|
| July   | Yousaf        | A Prospective Cohort Study in Nonhospitalized Household Contacts With Severe Acute Respiratory Syndrome Coronavirus 2 Infection: Symptom Profiles and Symptom Change Over Time    | CID  | <a href="https://doi.org/10.1093/cid/ciaa1072">https://doi.org/10.1093/cid/ciaa1072</a>                                 | Analytic    | Prospective cohort     | Field data collection        | Prevalence of symptoms in exposed contacts with positive RT-PCR tests                                                                                                   | General community                    | General population       | × |
| July   | Tenforde      | Symptom Duration and Risk Factors for Delayed Return to Usual Health Among Outpatients with COVID-19 in a Multistate Health Care Systems Network — United States, March–June 2020 | MMWR | <a href="http://dx.doi.org/10.15585/mmwr.mm6930e1externalicon">http://dx.doi.org/10.15585/mmwr.mm6930e1externalicon</a> | Analytic    | Cross-sectional        | Survey                       | Odds of not returning to “usual health” at 14–21 days after testing                                                                                                     | General community                    | General population       | × |
| July   | Paradis       | Notes from the Field: Public Health Efforts to Mitigate COVID-19 Transmission During the April 7, 2020 Election — City of Milwaukee, Wisconsin, March 13–May 5, 2020              | MMWR | <a href="http://dx.doi.org/10.15585/mmwr.mm6930a4externalicon">http://dx.doi.org/10.15585/mmwr.mm6930a4externalicon</a> | Descriptive | Ecologic               | Passive surveillance program | Trends in number of reported COVID-19 cases, hospitalizations, and associated deaths                                                                                    | General community                    | General population       |   |
| July   | Langdon-Embry | Notes from the Field: Rebound in Routine Childhood Vaccine Administration Following Decline During the COVID-19 Pandemic — New York City, March 1–June 27, 2020                   | MMWR | <a href="http://dx.doi.org/10.15585/mmwr.mm6930a3externalicon">http://dx.doi.org/10.15585/mmwr.mm6930a3externalicon</a> | Descriptive | Ecologic               | Passive surveillance program | Trends in routine childhood vaccinations                                                                                                                                | General community                    | General population       | × |
| August | Donahue       | Notes from the Field: Characteristics of Meat Processing Facility Workers with Confirmed SARS-CoV-2 Infection — Nebraska, April–May 2020                                          | MMWR | <a href="http://dx.doi.org/10.15585/mmwr.mm6931a3externalicon">http://dx.doi.org/10.15585/mmwr.mm6931a3externalicon</a> | Descriptive | Cross-sectional        | Field data collection        | Proportions of infected individuals with demographic, household, and clinical characteristics                                                                           | Industrial facility                  | Industrial workers       |   |
| August | Steinberg     | COVID-19 Outbreak Among Employees at a Meat Processing Facility — South Dakota, March–April 2020                                                                                  | MMWR | <a href="http://dx.doi.org/10.15585/mmwr.mm6931a2">http://dx.doi.org/10.15585/mmwr.mm6931a2</a>                         | Descriptive | Case series or cluster | Field data collection        | Proportions of infected individuals with demographic and clinical characteristics; weekly cumulative attack rates                                                       | Industrial facility                  | Industrial workers       |   |
| August | Szablewski    | SARS-CoV-2 Transmission and Infection Among Attendees of an Overnight Camp — Georgia, June 2020                                                                                   | MMWR | <a href="http://dx.doi.org/10.15585/mmwr.mm6931e1">http://dx.doi.org/10.15585/mmwr.mm6931e1</a>                         | Descriptive | Case series or cluster | Field data collection        | Attack rates by demographic characteristic                                                                                                                              | Non-school youth program             | Children                 |   |
| August | Krueger       | Characteristics and Outcomes of Contacts of COVID-19 Patients Monitored Using an Automated Symptom Monitoring Tool — Maine, May–June 2020                                         | MMWR | <a href="http://dx.doi.org/10.15585/mmwr.mm6931e2externalicon">http://dx.doi.org/10.15585/mmwr.mm6931e2externalicon</a> | Descriptive | Cross-sectional        | Field data collection        | Proportions of infected individuals with demographic and clinical characteristics                                                                                       | General community                    | General population       |   |
| August | Plucinski     | COVID-19 in Americans aboard the Diamond Princess cruise ship                                                                                                                     | CID  | <a href="https://doi.org/10.1093/cid/ciaa1180">https://doi.org/10.1093/cid/ciaa1180</a>                                 | Descriptive | Case series or cluster | Field data collection        |                                                                                                                                                                         | Cruise ship                          | General population       |   |
| August | Czeisler      | Mental Health, Substance Use, and Suicidal Ideation During the COVID-19 Pandemic — United States, June 24–30, 2020                                                                | MMWR | <a href="http://dx.doi.org/10.15585/mmwr.mm6932a1externalicon">http://dx.doi.org/10.15585/mmwr.mm6932a1externalicon</a> | Analytic    | Cross-sectional        | Survey                       | Prevalence estimates of mental health symptoms and conditions; prevalence ratios mental health symptoms and conditions for demographic and occupational characteristics | General community                    | General population       | × |
| August | Bigelow       | Transmission of SARS-CoV-2 Involving Residents Receiving Dialysis in a Nursing Home — Maryland, April 2020                                                                        | MMWR | <a href="http://dx.doi.org/10.15585/mmwr.mm6932e4externalicon">http://dx.doi.org/10.15585/mmwr.mm6932e4externalicon</a> | Descriptive | Case series or cluster | Field data collection        | Proportion of infected and uninfected individuals in each residential location and with each dialysis schedule                                                          | Skilled nursing facilities           | LCTF residents           |   |
| August | Godfred-Cato  | COVID-19–Associated Multisystem Inflammatory Syndrome in Children — United States, March–July 2020                                                                                | MMWR | <a href="http://dx.doi.org/10.15585/mmwr.mm6932e2externalicon">http://dx.doi.org/10.15585/mmwr.mm6932e2externalicon</a> | Descriptive | Cross-sectional        | Passive surveillance program | Proportion of infected individuals with clinical characteristics                                                                                                        | General community                    | Children                 |   |
| August | Sutton        | Notes from the Field: Seroprevalence Estimates of SARS-CoV-2 Infection in Convenience Sample — Oregon, May 11–June 15, 2020                                                       | MMWR | <a href="http://dx.doi.org/10.15585/mmwr.mm6932a4">http://dx.doi.org/10.15585/mmwr.mm6932a4</a>                         | Descriptive | Cross-sectional        | Field data collection        | Seroprevalence estimates by age                                                                                                                                         | General community                    | General population       | × |
| August | Hatfield      | Facility-Wide Testing for SARS-CoV-2 in Nursing Homes — Seven U.S. Jurisdictions, March–June 2020                                                                                 | MMWR | <a href="http://dx.doi.org/10.15585/mmwr.mm6932e5externalicon">http://dx.doi.org/10.15585/mmwr.mm6932e5externalicon</a> | Descriptive | Ecologic               | Field data collection        | Prevalence of infection by testing strategy                                                                                                                             | Skilled nursing facilities           | LCTF residents           | × |
| August | Kim           | Hospitalization Rates and Characteristics of Children Aged <18 Years Hospitalized with Laboratory-Confirmed COVID-19 — COVID-NET, 14 States, March 1–July 25, 2020                | MMWR | <a href="http://dx.doi.org/10.15585/mmwr.mm6932e3">http://dx.doi.org/10.15585/mmwr.mm6932e3</a>                         | Descriptive | Cross-sectional        | Active surveillance program  | Cumulative incidence of hospitalization                                                                                                                                 | General community                    | Children                 | × |
| August | Lewis         | Household Transmission of SARS-CoV-2 in the United States                                                                                                                         | CID  | <a href="https://doi.org/10.1093/cid/ciaa1166">https://doi.org/10.1093/cid/ciaa1166</a>                                 | Analytic    | Prospective cohort     | Field data collection        | SIR; odds of infection for selected contact and clinical characteristics                                                                                                | General community                    | General population       | × |
| August | Bui           | Racial and Ethnic Disparities Among COVID-19 Cases in Workplace Outbreaks by Industry Sector — Utah, March 6–June 5, 2020                                                         | MMWR | <a href="http://dx.doi.org/10.15585/mmwr.mm6933e3">http://dx.doi.org/10.15585/mmwr.mm6933e3</a>                         | Analytic    | Ecologic               | Passive surveillance program | Proportion of workplace outbreak versus non-outbreak infected individuals with selected risk factors                                                                    | Industrial facility                  | Industrial workers       | × |
| August | Davalantes    | Notes from the Field: COVID-19 Prevention Practices in State Prisons — Puerto Rico, 2020                                                                                          | MMWR | <a href="http://dx.doi.org/10.15585/mmwr.mm6933a4">http://dx.doi.org/10.15585/mmwr.mm6933a4</a>                         | Descriptive | Cross-sectional        | Passive surveillance program | Enumeration of infected individuals                                                                                                                                     | Correctional or detention facilities | Incarcerated individuals |   |

Table S3. List of reviewed CDC-affiliated studies.

|           |             |                                                                                                                                                                              |      |                                                                                                                           |             |                        |                              |                                                                                                                                                    |                                      |                          |   |
|-----------|-------------|------------------------------------------------------------------------------------------------------------------------------------------------------------------------------|------|---------------------------------------------------------------------------------------------------------------------------|-------------|------------------------|------------------------------|----------------------------------------------------------------------------------------------------------------------------------------------------|--------------------------------------|--------------------------|---|
| August    | Hagan       | Mass Testing for SARS-CoV-2 in 16 Prisons and Jails — Six Jurisdictions, United States, April–May 2020                                                                       | MMWR | <a href="http://dx.doi.org/10.15585/mmwr.mm6933a3external icon">http://dx.doi.org/10.15585/mmwr.mm6933a3external icon</a> | Descriptive | Ecologic               | Active surveillance program  | Point prevalence of infection                                                                                                                      | Correctional or detention facilities | Incarcerated individuals | × |
| August    | Oster       | Trends in Number and Distribution of COVID-19 Hotspot Counties — United States, March 8–July 15, 2020                                                                        | MMWR | <a href="http://dx.doi.org/10.15585/mmwr.mm6933e2external icon">http://dx.doi.org/10.15585/mmwr.mm6933e2external icon</a> | Descriptive | Ecologic               | Passive surveillance program | Number of COVID-19 hotspot counties by time period                                                                                                 | General community                    | General population       |   |
| August    | Moore       | Disparities in Incidence of COVID-19 Among Underrepresented Racial/Ethnic Groups in Counties Identified as Hotspots During June 5–18, 2020 — 22 States, February–June 2020   | MMWR | <a href="http://dx.doi.org/10.15585/mmwr.mm6933e1external icon">http://dx.doi.org/10.15585/mmwr.mm6933e1external icon</a> | Descriptive | Ecologic               | Passive surveillance program | Ratio of proportion of ethnic group with infection to proportion of ethnic group in population                                                     | General community                    | General population       |   |
| August    | Link-Gelles | Limited Secondary Transmission of SARS-CoV-2 in Child Care Programs — Rhode Island, June 1–July 31, 2020                                                                     | MMWR | <a href="http://dx.doi.org/10.15585/mmwr.mm6934e2external icon">http://dx.doi.org/10.15585/mmwr.mm6934e2external icon</a> | Descriptive | Case series or cluster | Active surveillance program  | Enumeration of infected individuals                                                                                                                | Childcare facilities                 | General population       |   |
| August    | Hatcher     | COVID-19 Among American Indian and Alaska Native Persons — 23 States, January 31–July 3, 2020                                                                                | MMWR | <a href="http://dx.doi.org/10.15585/mmwr.mm6934e1external icon">http://dx.doi.org/10.15585/mmwr.mm6934e1external icon</a> | Descriptive | Cross-sectional        | Passive surveillance program | Cumulative incidence of infection by AI/NA status                                                                                                  | General community                    | General population       |   |
| August    | McBee       | Notes from the Field: Universal Statewide Laboratory Testing for SARS-CoV-2 in Nursing Homes — West Virginia, April 21–May 8, 2020                                           | MMWR | <a href="http://dx.doi.org/10.15585/mmwr.mm6934e4external icon">http://dx.doi.org/10.15585/mmwr.mm6934e4external icon</a> | Descriptive | Ecologic               | Active surveillance program  | Point prevalence of infection                                                                                                                      | Skilled nursing facilities           | LCTF residents           | × |
| September | Moreland    | Timing of State and Territorial COVID-19 Stay-at-Home Orders and Changes in Population Movement — United States, March 1–May 31, 2020                                        | MMWR | <a href="http://dx.doi.org/10.15585/mmwr.mm6935a2external icon">http://dx.doi.org/10.15585/mmwr.mm6935a2external icon</a> | Analytic    | Ecologic               | Other                        | Temporal changes in mobility measure                                                                                                               | General community                    | General population       |   |
| September | Blaisdell   | Preventing and Mitigating SARS-CoV-2 Transmission — Four Overnight Camps, Maine, June–August 2020                                                                            | MMWR | <a href="http://dx.doi.org/10.15585/mmwr.mm6935e1external icon">http://dx.doi.org/10.15585/mmwr.mm6935e1external icon</a> | Descriptive | Ecologic               | Field data collection        | Prevalence of characteristics of summer camp attendees                                                                                             | Non-school youth program             | Children                 |   |
| September | Self        | Seroprevalence of SARS-CoV-2 Among Frontline Health Care Personnel in a Multistate Hospital Network — 13 Academic Medical Centers, April–June 2020                           | MMWR | <a href="http://dx.doi.org/10.15585/mmwr.mm6935e2">http://dx.doi.org/10.15585/mmwr.mm6935e2</a>                           | Descriptive | Cross-sectional        | Field data collection        | Seroprevalence                                                                                                                                     | Healthcare facility                  | Healthcare workers       | × |
| September | Yoon        | Prevalence among People Experiencing Homelessness and Homelessness Service Staff during Early Community Transmission in Atlanta, Georgia, April–May 2020                     | CID  | <a href="https://doi.org/10.1093/cid/ciaa1340">https://doi.org/10.1093/cid/ciaa1340</a>                                   | Analytic    | Cross-sectional        | Field data collection        | Point prevalence of SARS-CoV-2 RT-PCR positive test by "sheltered" status                                                                          | Homeless shelter                     | Homeless individuals     | × |
| September | Fisher      | Community and Close Contact Exposures Associated with COVID-19 Among Symptomatic Adults ≥18 Years in 11 Outpatient Health Care Facilities — United States, July 2020         | MMWR | <a href="http://dx.doi.org/10.15585/mmwr.mm6936a5">http://dx.doi.org/10.15585/mmwr.mm6936a5</a>                           | Analytic    | Case-control           | Survey                       | Odds ratios for risk factors for infection                                                                                                         | General community                    | General population       | × |
| September | Silver      | Prevalence of Underlying Medical Conditions Among Selected Essential Critical Infrastructure Workers — Behavioral Risk Factor Surveillance System, 31 States, 2017–2018      | MMWR | <a href="http://dx.doi.org/10.15585/mmwr.mm6936a3external icon">http://dx.doi.org/10.15585/mmwr.mm6936a3external icon</a> | Analytic    | Cross-sectional        | Survey                       | Adjusted prevalence ratio of underlying health conditions among essential workers                                                                  | General community                    | General population       |   |
| September | Czeisler    | Delay or Avoidance of Medical Care Because of COVID-19–Related Concerns — United States, June 2020                                                                           | MMWR | <a href="http://dx.doi.org/10.15585/mmwr.mm6936a4">http://dx.doi.org/10.15585/mmwr.mm6936a4</a>                           | Analytic    | Cross-sectional        | Survey                       | Adjusted prevalence ratios for characteristics associated with delay or avoidance of urgent or emergency medical care                              | General community                    | General population       | × |
| September | Telford     | Preventing COVID-19 Outbreaks in Long-term Care Facilities Through Preemptive Testing of Residents and Staff Members — Fulton County, Georgia, March–May 2020                | MMWR | <a href="http://dx.doi.org/10.15585/mmwr.mm6937a4external icon">http://dx.doi.org/10.15585/mmwr.mm6937a4external icon</a> | Analytic    | Ecologic               | Field data collection        | Prevalence of infection identified by testing by testing strategy                                                                                  | Skilled nursing facilities           | LCTF residents           | × |
| September | Bui         | Association Between CMS Quality Ratings and COVID-19 Outbreaks in Nursing Homes — West Virginia, March 17–June 11, 2020                                                      | MMWR | <a href="http://dx.doi.org/10.15585/mmwr.mm6937a5external icon">http://dx.doi.org/10.15585/mmwr.mm6937a5external icon</a> | Analytic    | Ecologic               | Passive surveillance program | Odds of skilled nursing facility outbreak by facility characteristic                                                                               | Skilled nursing facilities           | LCTF residents           | × |
| September | Taylor      | Serial Testing for SARS-CoV-2 and Virus Whole Genome Sequencing Inform Infection Risk at Two Skilled Nursing Facilities with COVID-19 Outbreaks — Minnesota, April–June 2020 | MMWR | <a href="http://dx.doi.org/10.15585/mmwr.mm6937a3">http://dx.doi.org/10.15585/mmwr.mm6937a3</a>                           | Descriptive | Case series or cluster | Field data collection        | Characteristics of infected individuals                                                                                                            | Skilled nursing facilities           | LCTF residents           |   |
| September | Lopez       | Transmission Dynamics of COVID-19 Outbreaks Associated with Child Care Facilities — Salt Lake City, Utah, April–July 2020                                                    | MMWR | <a href="http://dx.doi.org/10.15585/mmwr.mm6937e3external icon">http://dx.doi.org/10.15585/mmwr.mm6937e3external icon</a> | Descriptive | Case series or cluster | Field data collection        | Frequency of characteristics of all staff members, attendees, and their contacts associated with COVID-19 outbreaks at three child care facilities | Childcare facilities                 | General population       |   |
| September | Bixler      | SARS-CoV-2–Associated Deaths Among Persons Aged <21 Years — United States, February 12–July 31, 2020                                                                         | MMWR | <a href="http://dx.doi.org/10.15585/mmwr.mm6937e4external icon">http://dx.doi.org/10.15585/mmwr.mm6937e4external icon</a> | Descriptive | Cross-sectional        | Passive surveillance program | Frequency of demographic and clinical characteristics of SARS-CoV-2–associated deaths among persons aged <21 years                                 | General community                    | Children                 | × |



Table S3. List of reviewed CDC-affiliated studies.

|           |                  |                                                                                                                                                                             |      |                                                                                                                         |             |                        |                              |                                                                                                                                                                                                 |                          |                    |   |
|-----------|------------------|-----------------------------------------------------------------------------------------------------------------------------------------------------------------------------|------|-------------------------------------------------------------------------------------------------------------------------|-------------|------------------------|------------------------------|-------------------------------------------------------------------------------------------------------------------------------------------------------------------------------------------------|--------------------------|--------------------|---|
| September | Jackson          | Predictors at admission of mechanical ventilation and death in an observational cohort of adults hospitalized with COVID-19                                                 | CID  | <a href="https://doi.org/10.1093/cid/ciaa1459">https://doi.org/10.1093/cid/ciaa1459</a>                                 | Analytic    | Retrospective cohort   | Medical records              | Odds of death for demographic and clinical predictors                                                                                                                                           | General community        | General population | × |
| September | Lewis            | Disparities in COVID-19 Incidence, Hospitalizations, and Testing, by Area-Level Deprivation — Utah, March 3–July 9, 2020                                                    | MMWR | <a href="http://dx.doi.org/10.15585/mmwr.mm6938a4">http://dx.doi.org/10.15585/mmwr.mm6938a4</a>                         | Analytic    | Ecologic               | Passive surveillance program | Confirmed case and hospital admissions incidence by area level deprivation measure                                                                                                              | General community        | General population | × |
| September | Hughes           | Update: Characteristics of Health Care Personnel with COVID-19 — United States, February 12–July 16, 2020                                                                   | MMWR | <a href="http://dx.doi.org/10.15585/mmwr.mm6938a3externalicon">http://dx.doi.org/10.15585/mmwr.mm6938a3externalicon</a> | Descriptive | Cross-sectional        | Passive surveillance program | Frequency of demographic and clinical characteristics, hospitalization and intensive care unit (ICU) status among health care personnel (HCP) with confirmed COVID-19 infection by vital status | General community        | Healthcare workers |   |
| September | Lash             | COVID-19 Contact Tracing in Two Counties — North Carolina, June–July 2020                                                                                                   | MMWR | <a href="http://dx.doi.org/10.15585/mmwr.mm6938e3">http://dx.doi.org/10.15585/mmwr.mm6938e3</a>                         | Descriptive | Ecologic               | Active surveillance program  | Description of contact tracing metrics in two counties                                                                                                                                          | General community        | General population |   |
| September | anagiotakopoulou | SARS-CoV-2 Infection Among Hospitalized Pregnant Women: Reasons for Admission and Pregnancy Characteristics — Eight U.S. Health Care Centers, March 1–May 30, 2020          | MMWR | <a href="http://dx.doi.org/10.15585/mmwr.mm6938e2externalicon">http://dx.doi.org/10.15585/mmwr.mm6938e2externalicon</a> | Descriptive | Cross-sectional        | Passive surveillance program | Frequency of demographic, illness, and pregnancy characteristics of pregnant women hospitalized with SARS-CoV-2 infection                                                                       | General community        | Pregnant women     |   |
| September | Delahoy          | Characteristics and Maternal and Birth Outcomes of Hospitalized Pregnant Women with Laboratory-Confirmed COVID-19 — COVID-NET, 13 States, March 1–August 22, 2020           | MMWR | <a href="http://dx.doi.org/10.15585/mmwr.mm6938e1">http://dx.doi.org/10.15585/mmwr.mm6938e1</a>                         | Descriptive | Cross-sectional        | Passive surveillance program | Frequency of characteristics and birth outcomes of hospitalized pregnant women with COVID-19 infection                                                                                          | General community        | Pregnant women     |   |
| October   | Wilson           | Multiple COVID-19 Clusters on a University Campus — North Carolina, August 2020                                                                                             | MMWR | <a href="http://dx.doi.org/10.15585/mmwr.mm6939e3">http://dx.doi.org/10.15585/mmwr.mm6939e3</a>                         | Descriptive | Case series or cluster | Passive surveillance program | Numbers of confirmed COVID-19 cases among university students, faculty, and staff members                                                                                                       | College or university    | General population |   |
| October   | Salvatore        | Recent Increase in COVID-19 Cases Reported Among Adults Aged 18–22 Years — United States, May 31–September 5, 2020                                                          | MMWR | <a href="http://dx.doi.org/10.15585/mmwr.mm6939e4">http://dx.doi.org/10.15585/mmwr.mm6939e4</a>                         | Descriptive | Cross-sectional        | Passive surveillance program | Temporal changes in weekly COVID-19 RT-PCR testing volume and confirmed case incidence by age group                                                                                             | General community        | General population |   |
| October   | Leeb             | COVID-19 Trends Among School-Aged Children — United States, March 1–September 19, 2020                                                                                      | MMWR | <a href="http://dx.doi.org/10.15585/mmwr.mm6939e2externalicon">http://dx.doi.org/10.15585/mmwr.mm6939e2externalicon</a> | Descriptive | Cross-sectional        | Passive surveillance program | Frequency of demographic and clinical characteristics of school-aged children aged 5–11 years and 12–17 years with positive test results for SARS-CoV-2; weekly confirmed case incidence        | General community        | Children           |   |
| October   | Boehmer          | Change in Age Distribution of the COVID-19 Pandemic — United States, May–August 2020                                                                                        | MMWR | <a href="http://dx.doi.org/10.15585/mmwr.mm6939e1externalicon">http://dx.doi.org/10.15585/mmwr.mm6939e1externalicon</a> | Descriptive | Cross-sectional        | Passive surveillance program | Confirmed case incidence by age and month; trends in median age of individuals with tests, positive tests, confirmed cases, and ED visits for coronavirus like illness                          | General community        | General population |   |
| October   | Haston           | Characteristics Associated with Adults Remembering to Wash Hands in Multiple Situations Before and During the COVID-19 Pandemic — United States, October 2019 and June 2020 | MMWR | <a href="http://dx.doi.org/10.15585/mmwr.mm6940a2">http://dx.doi.org/10.15585/mmwr.mm6940a2</a>                         | Analytic    | Cross-sectional        | Survey                       | Prevalence of handwashing behavior by demographic and geographical characteristic                                                                                                               | General community        | General population |   |
| October   | Morris           | Case Series of Multisystem Inflammatory Syndrome in Adults Associated with SARS-CoV-2 Infection — United Kingdom and United States, March–August 2020                       | MMWR | <a href="http://dx.doi.org/10.15585/mmwr.mm6940e1">http://dx.doi.org/10.15585/mmwr.mm6940e1</a>                         | Descriptive | Cross-sectional        | Passive surveillance program | Summary of demographics, clinical features, treatments, and outcomes of nine adults reported to CDC with multisystem inflammatory syndrome (MIS) associated with SARS-CoV-2 infection           | General community        | General population |   |
| October   | Schwartz         | Adolescent with COVID-19 as the Source of an Outbreak at a 3-Week Family Gathering — Four States, June–July 2020                                                            | MMWR | <a href="http://dx.doi.org/10.15585/mmwr.mm6940e2">http://dx.doi.org/10.15585/mmwr.mm6940e2</a>                         | Descriptive | Case series or cluster | Field data collection        | Number of confirmed, probable, and suspected COVID-19 cases among event participants                                                                                                            | Private social gathering | General population |   |
| October   | Galloway         | Trends in COVID-19 Incidence After Implementation of Mitigation Measures — Arizona, January 22–August 7, 2020                                                               | MMWR | <a href="http://dx.doi.org/10.15585/mmwr.mm6940e3externalicon">http://dx.doi.org/10.15585/mmwr.mm6940e3externalicon</a> | Descriptive | Ecologic               | Passive surveillance program | Timing of community mitigation measures relative to COVID-19 confirmed case counts                                                                                                              | General community        | General population |   |
| October   | Czeisler         | Demographic Characteristics, Experiences, and Beliefs Associated with Hand Hygiene Among Adults During the COVID-19 Pandemic — United States, June 24–30, 2020              | MMWR | <a href="http://dx.doi.org/10.15585/mmwr.mm6941a3externalicon">http://dx.doi.org/10.15585/mmwr.mm6941a3externalicon</a> | Analytic    | Cross-sectional        | Survey                       | Prevalence of frequent hand hygiene after contact with high-touch public surfaces; odds ratios for washing hands after contact with high-touch public surfaces by respondent characteristics    | General community        | General population |   |
| October   | Wilson           | Factors Influencing Risk for COVID-19 Exposure Among Young Adults Aged 18–23 Years — Winnebago County, Wisconsin, March–July 2020                                           | MMWR | <a href="http://dx.doi.org/10.15585/mmwr.mm6941a3externalicon">http://dx.doi.org/10.15585/mmwr.mm6941a3externalicon</a> | Descriptive | Cross-sectional        | Passive surveillance program | Frequency of characteristics of confirmed COVID-19 cases among persons aged 18–23 years                                                                                                         | General community        | General population |   |
| October   | Atrubin          | An Outbreak of COVID-19 Associated with a Recreational Hockey Game — Florida, June 2020                                                                                     | MMWR | <a href="http://dx.doi.org/10.15585/mmwr.mm6941a4">http://dx.doi.org/10.15585/mmwr.mm6941a4</a>                         | Descriptive | Case series or cluster | Field data collection        | Number and timing confirmed cases among event attendees                                                                                                                                         | Private social gathering | General population |   |

Table S3. List of reviewed CDC-affiliated studies.

|         |             |                                                                                                                                                          |      |                                                                                                                         |             |                        |                                  |                                                                                                                                                            |                                      |                               |   |
|---------|-------------|----------------------------------------------------------------------------------------------------------------------------------------------------------|------|-------------------------------------------------------------------------------------------------------------------------|-------------|------------------------|----------------------------------|------------------------------------------------------------------------------------------------------------------------------------------------------------|--------------------------------------|-------------------------------|---|
| October | Oster       | Transmission Dynamics by Age Group in COVID-19 Hotspot Counties — United States, April–September 2020                                                    | MMWR | <a href="http://dx.doi.org/10.15585/mmwr.mm6941e1externalicon">http://dx.doi.org/10.15585/mmwr.mm6941e1externalicon</a> | Descriptive | Ecologic               | Passive surveillance program     | Trends in the percentage of positive SARS-CoV-2 RT-PCR tests by age group and U.S. Census region                                                           | General community                    | General population            |   |
| October | Gold        | Race, Ethnicity, and Age Trends in Persons Who Died from COVID-19 — United States, May–August 2020.                                                      | MMWR | <a href="http://dx.doi.org/10.15585/mmwr.mm6942">http://dx.doi.org/10.15585/mmwr.mm6942</a>                             | Descriptive | Cross-sectional        | National Vital Statistics System | Proportion of deaths attributed to COVID-19 by U.S. Census region, agegroup, and nursing home or long-term care facility status                            | General community                    | General population            |   |
| October | Cates       | Risk for In-Hospital Complications Associated with COVID-19 and Influenza — Veterans Health Administration, United States, October 1, 2018–May 31, 2020. | MMWR | <a href="http://dx.doi.org/10.15585/mmwr.mm6942">http://dx.doi.org/10.15585/mmwr.mm6942</a>                             | Analytic    | Retrospective cohort   | Medical records                  | Proportions and adjusted relative risk of selected COVID-19 respiratory and nonrespiratory complications for patients hospitalized with COVID vs Influenza | General community                    | General population            |   |
| October | Rossen      | Excess Deaths Associated with COVID-19, by Age and Race and Ethnicity — United States, January 26–October 3, 2020.                                       | MMWR | <a href="http://dx.doi.org/10.15585/mmwr.mm6942e2">http://dx.doi.org/10.15585/mmwr.mm6942e2</a>                         | Descriptive | Cross-sectional        | National Vital Statistics System | Excess deaths associated with COVID-19 status, by week, by agegroup, by race / ethnicity designation                                                       | General community                    | General population            | × |
| October | Murray      | Mitigating a COVID-19 Outbreak Among Major League Baseball Players — United States, 2020.                                                                | MMWR | <a href="http://dx.doi.org/10.15585/mmwr.mm6942a4">http://dx.doi.org/10.15585/mmwr.mm6942a4</a>                         | Descriptive | Case series or cluster | Field data collection            | ?                                                                                                                                                          | General community                    | Athletes                      |   |
| October | Dasgupta    | Association Between Social Vulnerability and a County's Risk for Becoming a COVID-19 Hotspot — United States, June 1–July 25, 2020.                      | MMWR | <a href="http://dx.doi.org/10.15585/mmwr.mm6942a3">http://dx.doi.org/10.15585/mmwr.mm6942a3</a>                         | Analytic    | Ecologic               | Passive surveillance program     | Associations between social vulnerability measures* and hotspot identification                                                                             | General community                    | General population            | × |
| October | Pringle     | COVID-19 in a Correctional Facility Employee Following Multiple Brief Exposures to Persons with COVID-19 — Vermont, July–August 2020                     | MMWR | <a href="http://dx.doi.org/10.15585/mmwr.mm6943e1externalicon">http://dx.doi.org/10.15585/mmwr.mm6943e1externalicon</a> | Descriptive | Case series or cluster | Field data collection            | Summary of type, frequency, and duration of close contacts                                                                                                 | Correctional or detention facilities | Correctional facility workers |   |
| October | Kambhampati | COVID-19–Associated Hospitalizations Among Health Care Personnel — COVID-NET, 13 States, March 1–May 31, 2020.                                           | MMWR | <a href="http://dx.doi.org/10.15585/mmwr.mm6943e3">http://dx.doi.org/10.15585/mmwr.mm6943e3</a>                         | Descriptive | Cross-sectional        | Active surveillance program      | Demographic and clinical characteristics of health care personnel (HCP) with COVID-19-associated hospitalizations                                          | Healthcare facility                  | Healthcare workers            |   |
| October | Teran       | Outbreak Among a University's Men's and Women's Soccer Teams — Chicago, Illinois, July–August 2020.                                                      | MMWR | <a href="http://dx.doi.org/10.15585/mmwr.mm6943e5">http://dx.doi.org/10.15585/mmwr.mm6943e5</a>                         | Analytic    | Case-control           | Field data collection            | Odds ratios for risk factors for infection                                                                                                                 | College or university                | Athletes                      | × |
| October | Hutchins    | COVID-19 Mitigation Behaviors by Age Group — United States, April–June 2020                                                                              | MMWR | <a href="http://dx.doi.org/10.15585/mmwr.mm6943e4">http://dx.doi.org/10.15585/mmwr.mm6943e4</a>                         | Analytic    | Cross-sectional        | Survey                           | Prevalence of engagement in mitigation behaviors                                                                                                           | General community                    | General population            |   |
| October | Fell        | SARS-CoV-2 Exposure and Infection Among Health Care Personnel — Minnesota, March 6–July 11, 2020                                                         | MMWR | <a href="http://dx.doi.org/10.15585/mmwr.mm6943a5">http://dx.doi.org/10.15585/mmwr.mm6943a5</a>                         | Analytic    | Cross-sectional        | Field data collection            | Prevalence of personal protective equipment (PPE) use by health care personnel (HCP) during SARS-CoV-2 exposures                                           | Healthcare facility                  | healthcare workers            |   |
| October | Pray        | COVID-19 Outbreak at an Overnight Summer School Retreat — Wisconsin, July–August 2020                                                                    | MMWR | <a href="http://dx.doi.org/10.15585/mmwr.mm6943a4">http://dx.doi.org/10.15585/mmwr.mm6943a4</a>                         | Descriptive | Case series or cluster | Field data collection            | Frequency of characteristics of confirmed COVID-19 cases among event attendees                                                                             | Public social gathering              | Children                      |   |
| October | Koonin      | Trends in the Use of Telehealth During the Emergence of the COVID-19 Pandemic — United States, January–March 2020                                        | MMWR | <a href="http://dx.doi.org/10.15585/mmwr.mm6943a3">http://dx.doi.org/10.15585/mmwr.mm6943a3</a>                         | Descriptive | Ecologic               | Other                            | Trends in telehealth visits                                                                                                                                | General community                    | General population            | × |
| October | Grijalva    | Transmission of SARS-CoV-2 Infections in Households — Tennessee and Wisconsin, April–September 2020                                                      | MMWR | <a href="http://dx.doi.org/10.15585/mmwr.mm6944e1">http://dx.doi.org/10.15585/mmwr.mm6944e1</a>                         | Analytic    | Prospective cohort     | Field data collection            | SIR; by age                                                                                                                                                | General community                    | General population            | × |
